# Supplementary figures and images for: Whole-brain mapping of socially isolated zebrafish reveals that lonely fish are not loners
Source: eLife journal article supplement (doi:10.7554/elife.55863), 2020-05-04

# Figure 1 - figure supplement 1

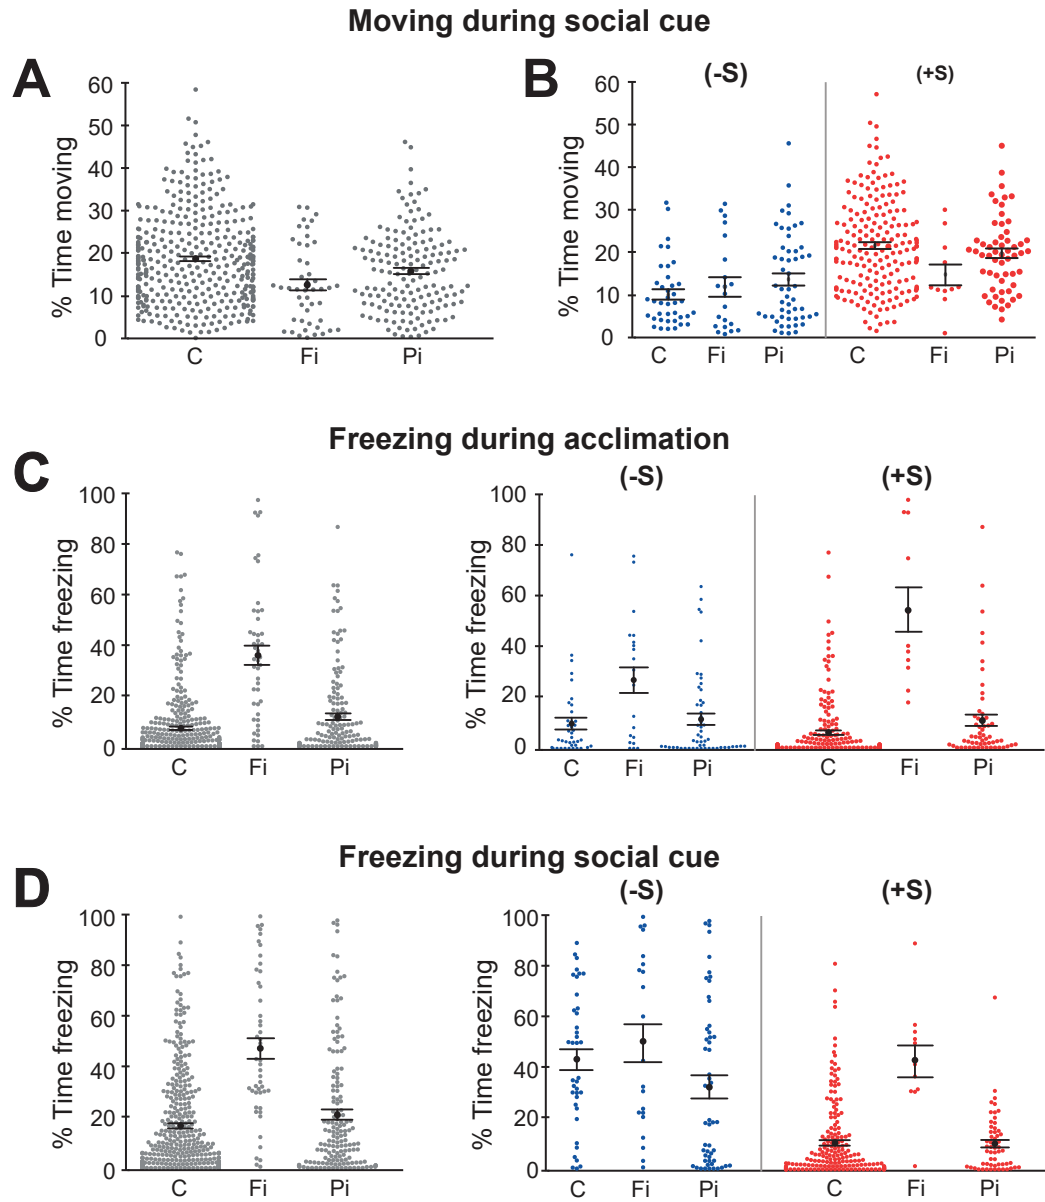

Supplement: supp [file elife_poa_e55863_Figure_1_figure_supplement_1.pdf › elife_poa_e55863_Figure_1_figure_supplement_1.pdf]

# Figure 4 - figure supplement 1

**A**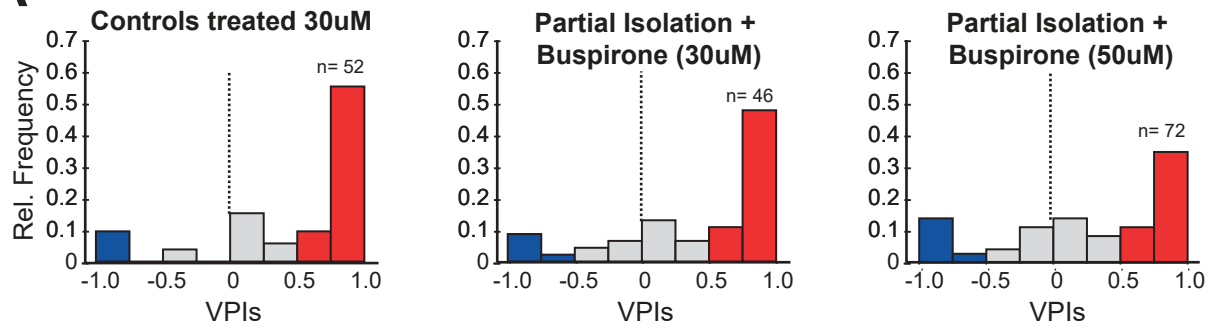**B**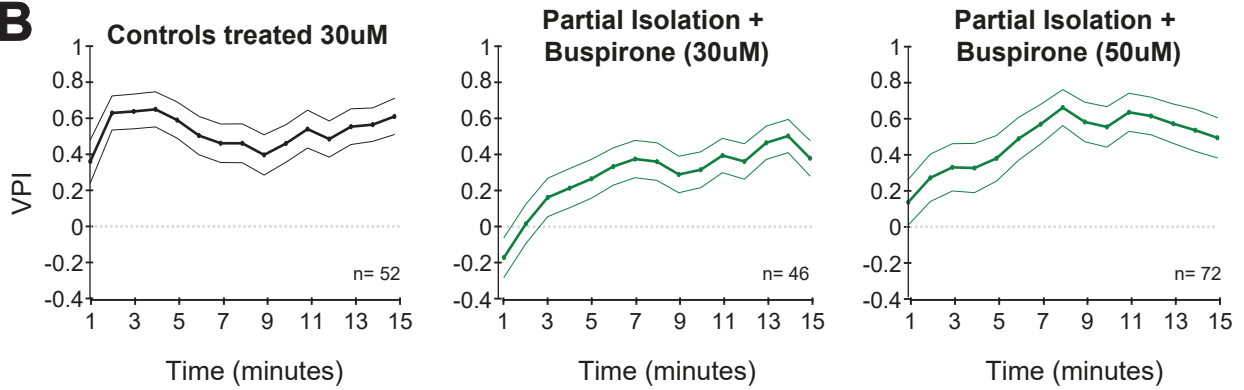

Supplement: supp [file elife_poa_e55863_Figure_4_figure_supplement_1.pdf › elife_poa_e55863_Figure_4_figure_supplement_1.pdf]
